# Supplementary material for: N6-Methyladenosine methylome landscape and a novel m6A-related gene risk signature associated with the prognosis of glioblastoma
Source: Research Square preprint supplement (doi:10.21203/rs.3.rs-300744/v1), 2021-03-19
Supplement: Supplementary file 1 [file c4bf0c73e41e4aa0ff7fc57d.xlsx]

## Sheet: Enriched-hallmark
	Direction	adj.Pval	nGenes	Pathways	Genes
1	Down regulated	0.000417801	8	MSigDB:HALLMARK ESTROGEN RESPONSE LATE	TFF1 MYB SCNN1A TFF3 LLGL2 AGR2 TMPRSS3 DHRS2
2	Down regulated	0.00100055	7	MSigDB:HALLMARK ESTROGEN RESPONSE EARLY	MYB TFF1 SCNN1A TMPRSS3 TFF3 DHRS2 ELF3
3	Down regulated	0.00100055	7	MSigDB:HALLMARK KRAS SIGNALING UP	GABRA3 FGF9 TSPAN1 BMP2 GADD45G USH1C SNAP91
4	Up regulated	1.59698e-54	130	MSigDB:HALLMARK EPITHELIAL MESENCHYMAL TRANSITION	COL3A1 COL5A2 COL5A1 COL1A1 FN1 COL6A3 SERPINE1 COL1A2 COL4A1 COL4A2 IGFBP3 TGFBI SPARC LUM LAMC1 LOX TAGLN COL6A2 ITGAV THBS2 COL16A1 NNMT CDH2 MMP2 THBS1 BGN SERPINH1 FSTL1 POSTN THY1 SPP1 TNC NID2 ITGB5 VIM LOXL1 FBLN5 ELN CDH11 BMP1 IL32 TIMP1 QSOX1 TIMP3 VCAM1 CALD1 SGCB ECM1 LAMA2 TPM2 DAB2 EMP3 ITGA5 VEGFA WNT5A SDC1 PLOD2 PCOLCE COL5A3 RHOB HTRA1 FGF2 GADD45A MEST TNFRSF11B CD59 ACTA2 EFE…
5	Up regulated	5.0058e-36	110	MSigDB:HALLMARK TNFA SIGNALING VIA NFKB	JUNB CXCL2 ATF3 TNFAIP3 PTGS2 CD83 CCL20 CXCL3 MAFF TNFAIP2 HBEGF KLF6 BIRC3 PLAUR ICAM1 JUN EGR3 IL1B BCL2A1 PPP1R15A SOD2 DUSP1 MAP3K8 F3 SDC4 EGR1 NFKB1 LIF PTX3 FOSL1 JAG1 GCH1 CCL2 RCAN1 IER2 CFLAR NFKBIE PHLDA1 IER5 GEM GADD45A CXCL10 PLK2 EGR2 DUSP5 SERPINE1 TRIB1 TIPARP RELA BIRC2 CXCL6 LITAF TNFAIP6 CD44 PLAU TNIP1 FOSL2 PFKFB3 YRDC SQSTM1 GADD45B G0S2 MCL1 VEGFA MAP2K3 CDKN1A TANK IL18 …
6	Up regulated	7.82992e-35	108	MSigDB:HALLMARK MTORC1 SIGNALING	CALR HK2 PGK1 SLC7A5 CTSC ACSL3 TFRC DDIT3 IFRD1 PLOD2 CORO1A LDHA VLDLR WARS P4HA1 ACTR2 IDH1 SLC2A1 GBE1 SERPINH1 PSPH CDKN1A HSPA9 HSPA5 SLA ACLY SLC7A11 SSR1 SQSTM1 PSMC2 PRDX1 TRIB3 TPI1 ELOVL6 HPRT1 AURKA HMGCR GAPDH DHFR DHCR7 IMMT YKT6 INSIG1 IGFBP5 IFI30 CYP51A1 ENO1 CYB5B SHMT2 TXNRD1 G6PD RAB1A PNO1 ACTR3 LDLR SLC2A3 EDEM1 ITGB2 ME1 ALDOA UFM1 STC1 FDXR RRM2 DHCR24 PSMC4 CTH PSME3 QDPR…
7	Up regulated	1.31956e-30	90	MSigDB:HALLMARK APOPTOSIS	CASP3 CASP7 CFLAR BIRC3 PMAIP1 CASP8 JUN MCL1 IL1B BAX CDKN1A GADD45A DDIT3 GSN CASP6 SQSTM1 EGR3 CD44 FAS IL18 IGFBP6 PRF1 DAP CCND1 F2R CASP4 TNFRSF12A RHOB PDGFRB TSPO CCND2 TIMP1 CTNNB1 IRF1 HSPB1 ADD1 TIMP2 TIMP3 LEF1 CASP1 BCL10 IGF2R CDC25B PPP3R1 CLU ATF3 LGALS3 LUM LMNA GADD45B CDK2 RETSAT ENO2 HMOX1 GCH1 MMP2 PLAT APP PSEN1 PSEN2 SOD2 TGFB2 RELA WEE1 CD14 DNAJC3 CTH HMGB2 CYLD GSR BGN B…
8	Up regulated	3.87131e-25	94	MSigDB:HALLMARK HYPOXIA	PGK1 GBE1 PFKL ALDOA ENO2 NDRG1 HK2 SLC2A1 P4HA1 ADM P4HA2 ENO1 PFKFB3 VEGFA TPI1 LDHA GYS1 GAPDH ANGPTL4 JUN SERPINE1 LOX MAFF SLC2A3 IGFBP3 FOS HK1 CITED2 ISG20 STC1 CSRP2 VLDLR F3 UGP2 HMOX1 CHST2 TMEM45A ATF3 CAV1 IRS2 GAA SDC4 STBD1 IGFBP1 PLAUR S100A4 EGFR IDS CDKN1A DUSP1 PPP1R3C KDELR3 DTNA ADORA2B NR3C1 KLF6 GPC4 TNFAIP3 CA12 HEXA BGN PPP1R15A PIM1 MT1E SDC3 TIPARP ANXA2 DDIT3 CXCR4 CP K…
9	Up regulated	1.0551e-21	90	MSigDB:HALLMARK GLYCOLYSIS	PGK1 ALDOA ENO1 TPI1 VEGFA HK2 LDHA GUSB PYGB P4HA1 PMM2 SDC1 B4GALT7 IGFBP3 CHPF B3GAT3 CHST12 HS2ST1 MPI GNPDA1 B3GAT1 G6PD MDH2 CHST1 GPC1 GFPT1 SLC35A3 EGFR ANGPTL4 CITED2 PLOD2 QSOX1 ME2 SPAG4 P4HA2 ENO2 EXT2 SLC25A13 HMMR CXCR4 GPC4 FUT8 HSPA5 ME1 ADORA2B UGP2 TPST1 GYS1 CHST2 PHKA2 IRS2 KDELR3 VLDLR CD44 AGL SOX9 CASP6 GLCE COPB2 PLOD1 SDC2 PAXIP1 NSDHL RARS SDC3 COL5A1 STC1 KIF20A AURKA I…
10	Up regulated	1.69793e-21	89	MSigDB:HALLMARK P53 PATHWAY	CDKN1A FAS TOB1 GADD45A PHLDA3 ZMAT3 DDB2 EI24 ATF3 BAX FDXR SAT1 TP53 NOTCH1 NINJ1 FOS S100A10 PLK3 XPC TRIAP1 CCND2 PDGFA NDRG1 RALGDS CYFIP2 ADA PRKAB1 PLK2 CASP1 RCHY1 PCNA RPS27L RB1 PPP1R15A DDIT3 FUCA1 HSPA4L EPHX1 ABHD4 IER5 RGS16 ZFP36L1 SDC1 RAP2B PROCR NOL8 CEBPA KIF13B TRAFD1 ANKRA2 HBEGF TRIB3 INHBB ABAT CTSD PTPRE WWP1 TCN2 CDKN2AIP ZNF365 EPHA2 JUN MAPKAPK3 SLC7A11 IRAK1 UPP1 CD81 …
11	Up regulated	1.52678e-20	88	MSigDB:HALLMARK INTERFERON GAMMA RESPONSE	STAT1 MX1 IFIT3 IFI35 OAS2 EIF2AK2 RSAD2 IRF1 OAS3 CXCL10 IFI44 BST2 XAF1 SP110 IFITM3 LGALS3BP IFIH1 IL10RA TRIM21 USP18 PTGS2 C1S NMI PSMB10 HERC6 RTP4 TNFAIP2 IFITM2 PLSCR1 CASP1 ICAM1 WARS ISG20 IRF2 TRIM14 FCGR1A JAK2 PARP12 TNFAIP6 VCAM1 SERPING1 RNF31 SOD2 LAP3 CD86 GCH1 PTPN6 IL4R CASP8 IFI30 CCL2 CASP7 SECTM1 TRAFD1 HLA-DRB1 LCP2 RIPK1 UPP1 TDRD7 HIF1A TOR1B RBCK1 PDE4B MVP IL7 BPGM MYD8…
12	Up regulated	2.24801e-20	56	MSigDB:HALLMARK PROTEIN SECRETION	ARCN1 TMED10 COPB2 RAB14 COPB1 LAMP2 EGFR IGF2R AP3S1 BET1 CLCN3 CLTC AP2M1 RER1 ARF1 OCRL TMED2 PAM SCAMP1 VAMP3 VAMP4 VPS4B NAPA GNAS STX16 YKT6 SNX2 ARFGEF1 CLN5 USO1 DNM1L ARFIP1 ANP32E SCRN1 SEC31A RAB22A AP3B1 TPD52 CAV2 ATP1A1 ZW10 GALC ADAM10 RAB5A GOLGA4 SEC24D AP1G1 MAPK1 GOSR2 RPS6KA3 ABCA1 SNAP23 CD63 SSPN ARFGAP3 CTSC
13	Up regulated	9.07893e-18	67	MSigDB:HALLMARK UV RESPONSE DN	TJP1 MAP2K5 AGGF1 SIPA1L1 ATRN ANXA2 ATXN1 CAP2 SDC2 RND3 NR3C1 DLG1 ATP2B4 NIPBL FZD2 LTBP1 LDLR RBPMS RGS4 COL5A2 PRKAR2B GJA1 BCKDHB SERPINE1 CITED2 COL1A2 INSIG1 FYN PMP22 NOTCH2 SYNJ2 MAP1B PTEN SPOP F3 DUSP1 VLDLR CAV1 SFMBT1 ADORA2B COL3A1 EFEMP1 LAMC1 PIAS3 NRP1 DAB2 MAGI2 ANXA4 COL1A1 SCHIP1 DDAH1 PDGFRB ATRX TGFBR2 ATP2C1 NFKB1 MGLL FBLN5 PDLIM5 SRI IGFBP5 SNAI2 ATP2B1 FHL2 APBB2 MT1E H…
14	Up regulated	1.26712e-17	83	MSigDB:HALLMARK MITOTIC SPINDLE	CLASP1 KIF11 KIF23 MYO9B MYH9 CKAP5 RACGAP1 ARHGEF3 KIF2C APC PAFAH1B1 KIF3B KIF15 BIRC5 KIF4A PLK1 RASA1 TOP2A TRIO PRC1 MAP1S DOCK4 SAC3D1 ARHGAP5 GSN ABR NCK1 CENPF CENPE MID1 KLC1 CDC42EP4 MAP3K11 ABL1 TIAM1 NCK2 RANBP9 TPX2 KIF3C SHROOM2 PALLD ARFIP2 MID1IP1 DLG1 FLNA ARHGEF12 RALBP1 RAB3GAP1 FARP1 SYNPO ECT2 STAU1 ARHGDIA AURKA FBXO5 NUSAP1 PXN CD2AP ATG4B ARHGAP29 CCNB2 NEDD9 ACTN4 PKD2 CL…
15	Up regulated	3.93796e-17	81	MSigDB:HALLMARK KRAS SIGNALING UP	ANGPTL4 ITGA2 SPRY2 HBEGF ETV4 DUSP6 SCG5 ETV5 ITGB2 PPBP G0S2 BIRC3 TMEM158 TNFAIP3 MMP9 IGFBP3 SPP1 ETV1 CCND2 TSPAN7 ITGBL1 EMP1 TRIB2 AMMECR1 TMEM176B LAPTM5 CD37 IL1B GYPC LY96 PRRX1 C3AR1 PLAUR AKAP12 PLAT CXCL10 YRDC HDAC9 LIF PPP1R15A CCL20 HOXD11 TRIB1 F2RL1 TSPAN13 CFH TMEM176A PTGS2 IL33 MAFB LCP1 CA2 SERPINA3 RGS16 CTSS CPE SPARCL1 ABCB1 BTBD3 DNMBP IL10RA CROT CBR4 DOCK2 GPRC5B F13A1…
16	Up regulated	4.87644e-17	81	MSigDB:HALLMARK G2M CHECKPOINT	AURKA TOP2A CCNB2 CENPA BIRC5 CDC20 PLK1 PRC1 NDC80 KIF11 NUSAP1 KIF2C TPX2 SMC4 CENPF RACGAP1 CENPE KIF23 UBE2C MCM6 MCM3 PTTG1 KIF4A MAD2L1 HMMR KPNA2 CDKN3 CDC25B MCM5 LMNB1 KIF15 CHEK1 UBE2S DBF4 TACC3 MCM2 STAG1 GINS2 FBXO5 EZH2 SUV39H1 GSPT1 TFDP1 CCND1 KPNB1 HUS1 PDS5B STIL ABL1 DTYMK CHMP1A DKC1 ATRX SLC7A5 PRPF4B CUL1 UPF1 DR1 SMC2 RBM14 RPA2 HOXC10 CUL4A SS18 PBK HIF1A SYNCRIP NCL RAD23…
17	Up regulated	4.87644e-17	81	MSigDB:HALLMARK COMPLEMENT	C1S SERPINE1 SERPING1 CTSS C1QA CASP1 TIMP1 CD59 LAP3 SPOCK2 CTSB PLAUR C3 CASP4 STX4 CTSC USP15 DUSP6 CFH FN1 CA2 APOBEC3G CLU LRP1 CTSD S100A9 PLAT CASP7 PFN1 RNF4 IRF1 PIK3CA CALM1 RASGRP1 USP14 LCP2 KIF2A OLR1 LYN SIRT6 PRKCD ITGAM LTF MAFF SH2B3 PRDM4 GNAI3 IRF2 FYN JAK2 USP8 RHOG LAMP2 PIM1 F3 GNAI2 PLSCR1 HSPA5 GNB2 DOCK4 FDX1 TIMP2 FCER1G ANXA5 GCA COL4A2 CSRP1 DUSP5 CASP3 USP16 CP PSEN1 …
18	Up regulated	6.55158e-17	81	MSigDB:HALLMARK E2F TARGETS	AURKA CENPE DNMT1 DONSON GINS1 GINS4 MAD2L1 MCM2 MCM4 MCM5 MCM7 MELK NUP205 PCNA RAD51AP1 RFC2 RPA2 SUV39H1 MCM3 TOP2A MCM6 BIRC5 CCNB2 RRM2 HMGB2 BUB1B RFC3 EZH2 CHEK1 SMC4 CDC20 PLK1 KIF2C TRIP13 HMMR RACGAP1 KPNA2 MSH2 CDKN3 ATAD2 RPA1 TIPIN NCAPD2 KIF4A LMNB1 UNG CDCA3 ASF1B TIMELESS UBE2S PRKDC SPAG5 POLD3 TACC3 CDC25B SLBP RNASEH2A RFC1 POLD2 DCK RAD1 PTTG1 TUBG1 ZW10 PA2G4 SSRP1 ANP32E CDK…
